# Supplementary material for: Alteration of the cutaneous microbiome in psoriasis and potential role in Th17 polarization
Source: PubMed Central journal article supplement (PMC6125946; doi:10.1186/s40168-018-0533-1), 2018-09-05

# Supplementary Figure 1

A

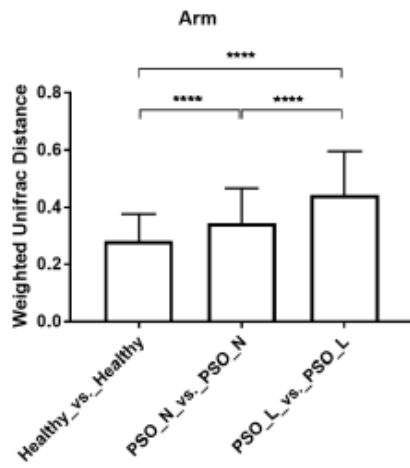

B

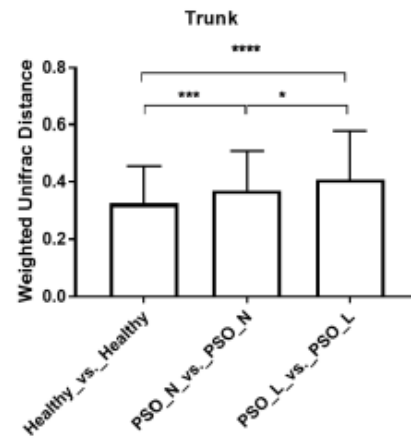

C

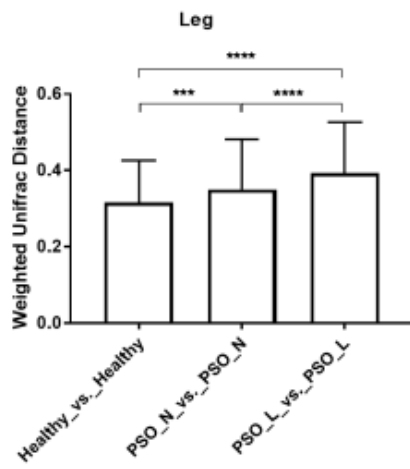

D

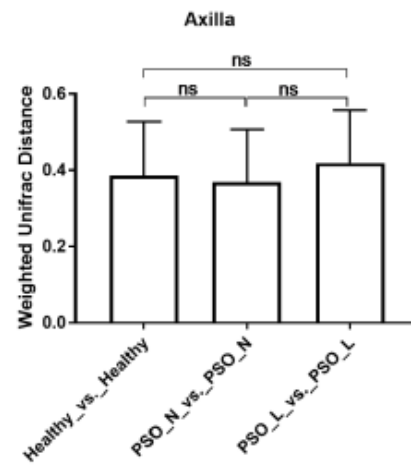

E

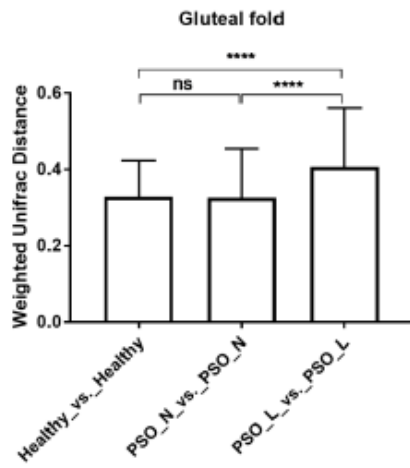

F

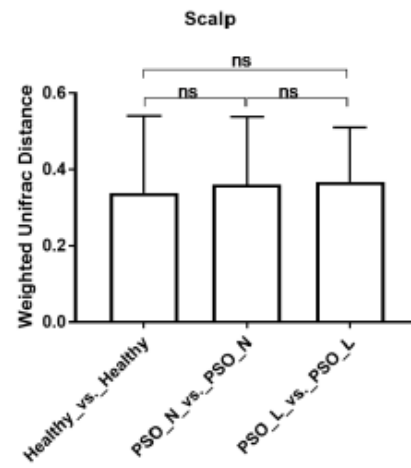

Supplementary Figure 2

A

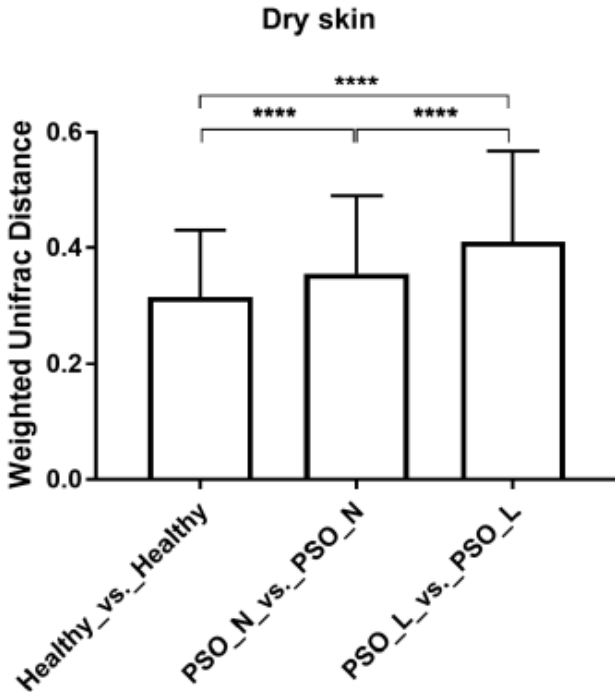

B

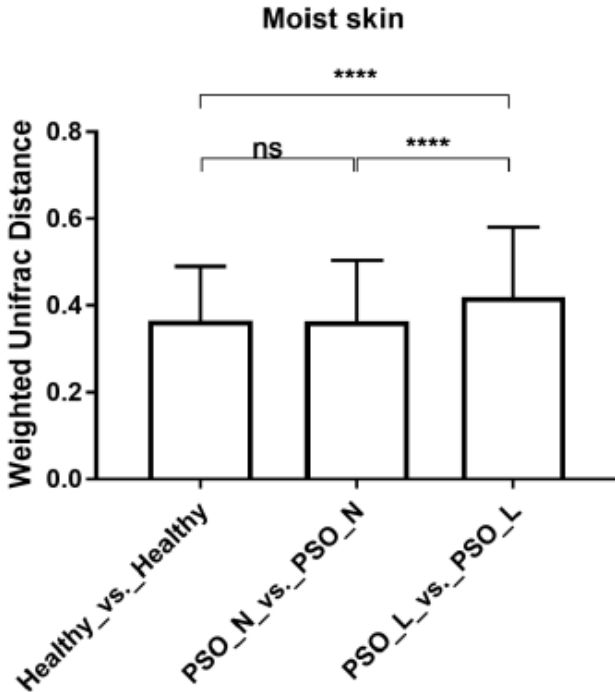

# Supplementary Figure 3:

**A**

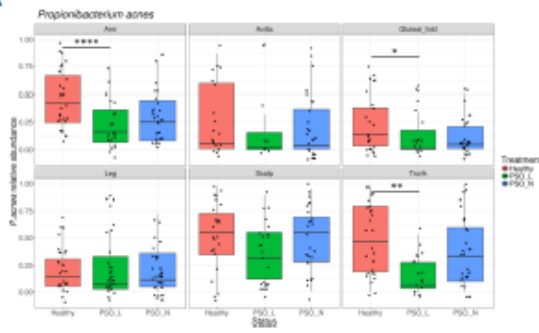

**B**

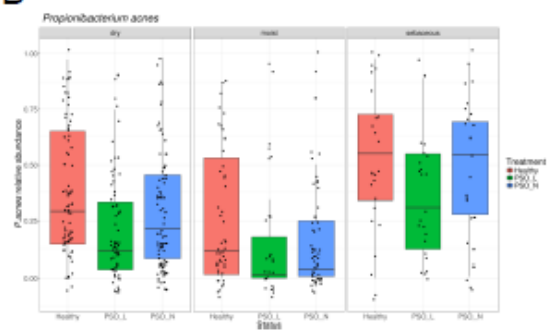

**C**

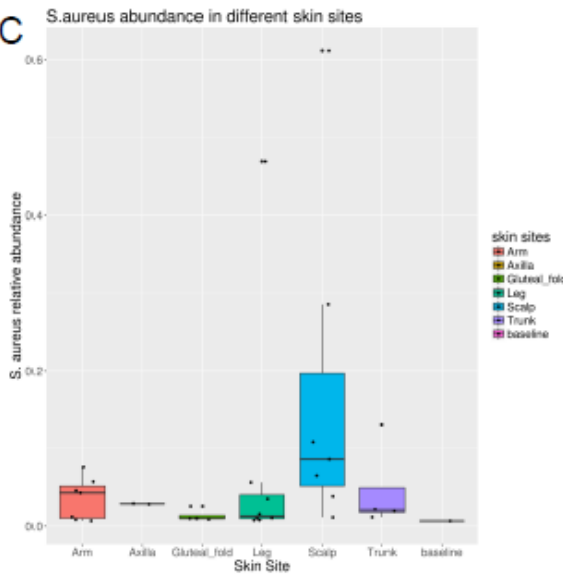

**D**

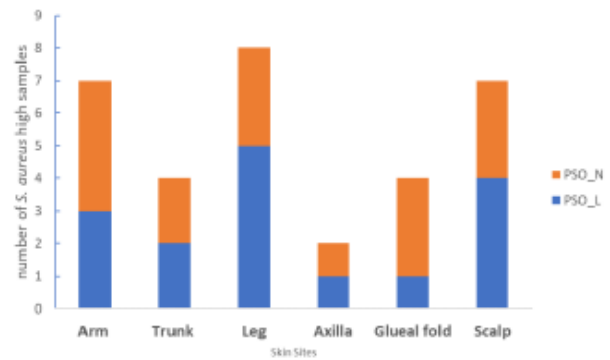

**E**

Bacterial species significantly associated with *S. aureus* high vs *S. aureus* low in psoriasis patients

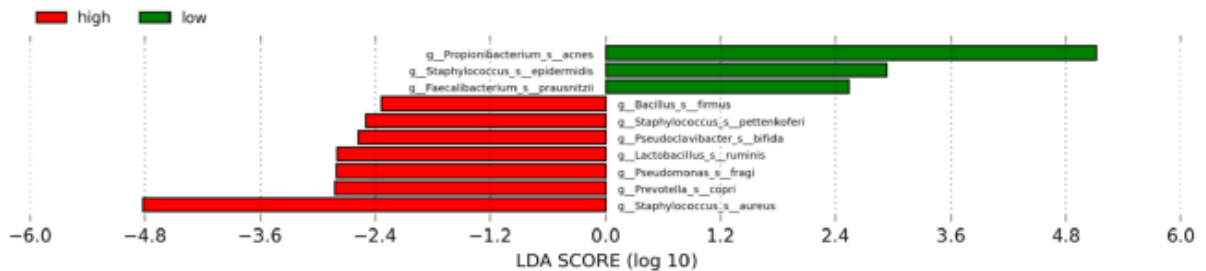

# Supplementary Figure 4

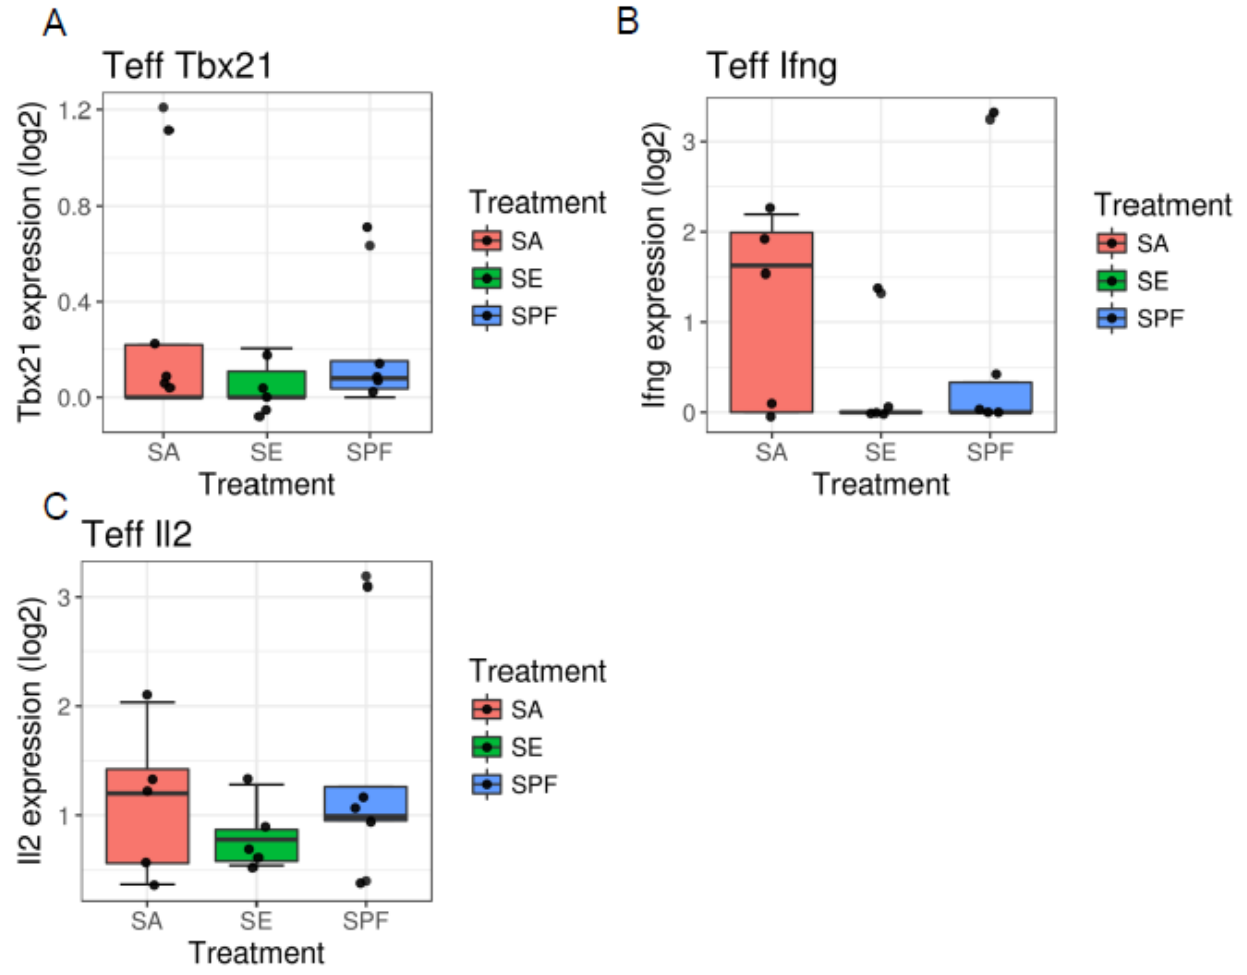

# Supplementary Figure 5

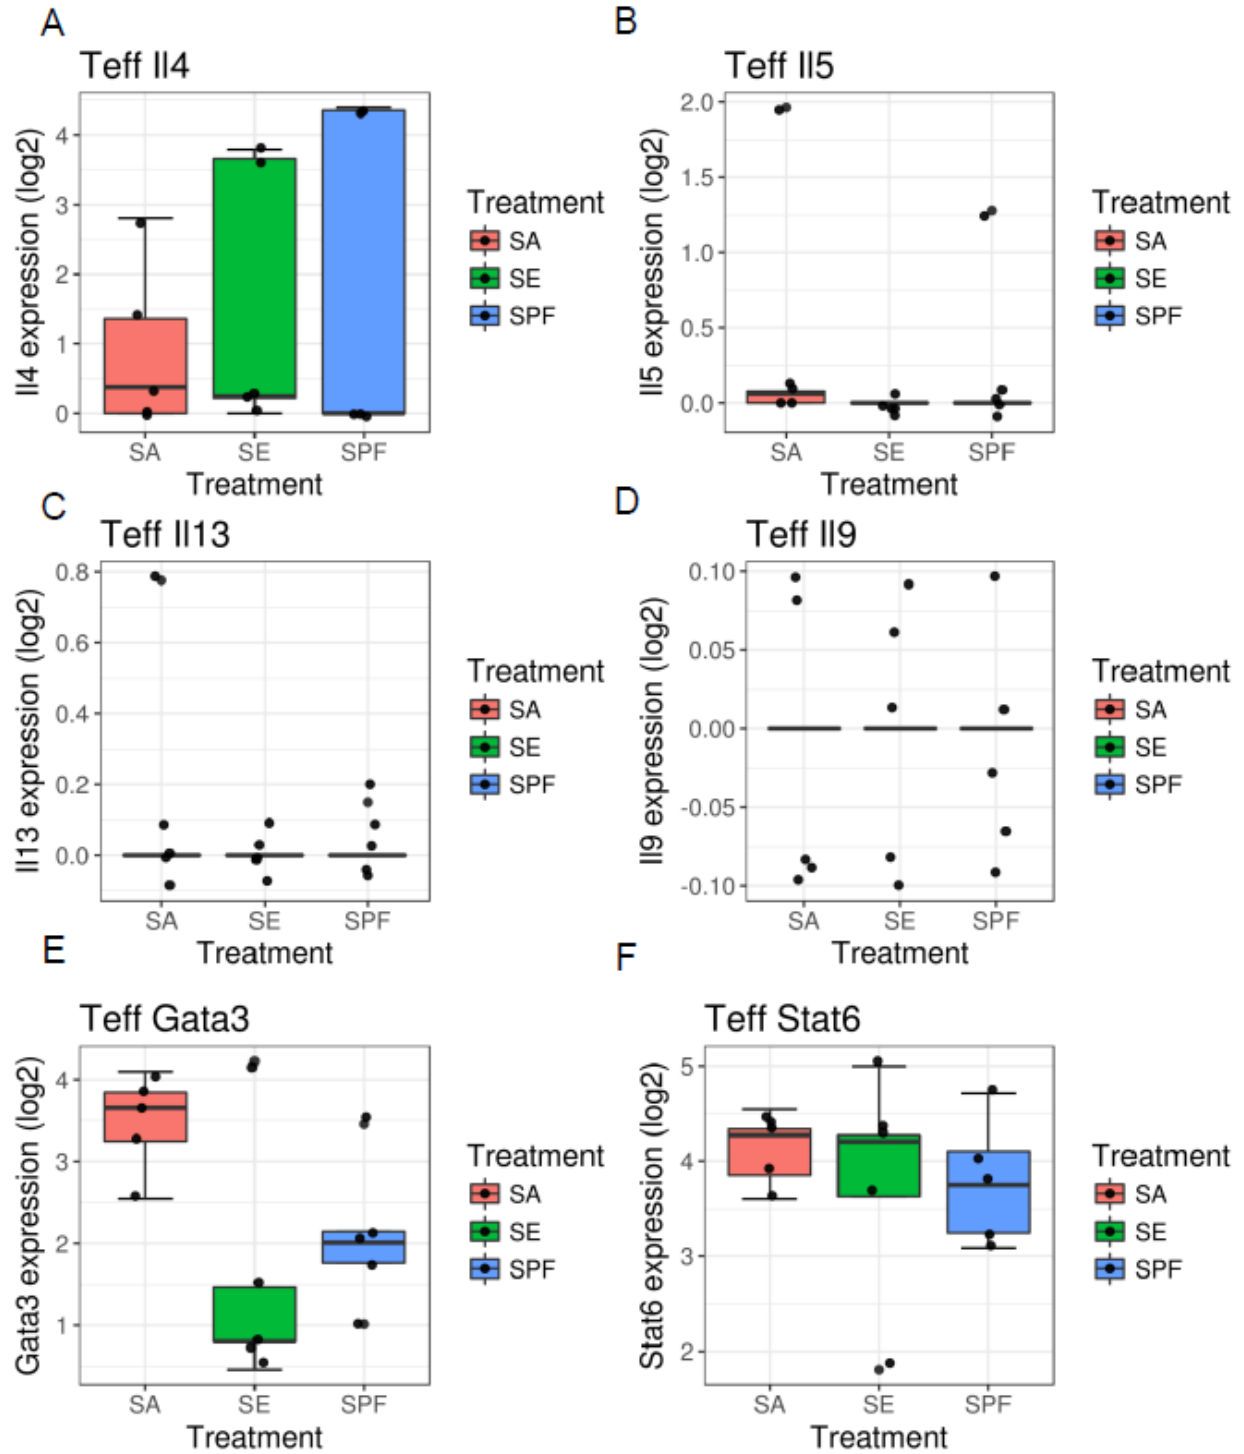

Supplement: 40168_2018_533_MOESM1_ESM.pdf [file 40168_2018_533_MOESM1_ESM.pdf]
